# Supplementary material for: The 29.5 kb APOBEC3B Deletion Polymorphism Is Not Associated with Clinical Outcome of Breast Cancer
Source: PubMed Central journal article supplement (PMC4995039; doi:10.1371/journal.pone.0161731), 2016-08-23
Supplement: pone.0161731.s001.pdf [file pone.0161731.s001.pdf]

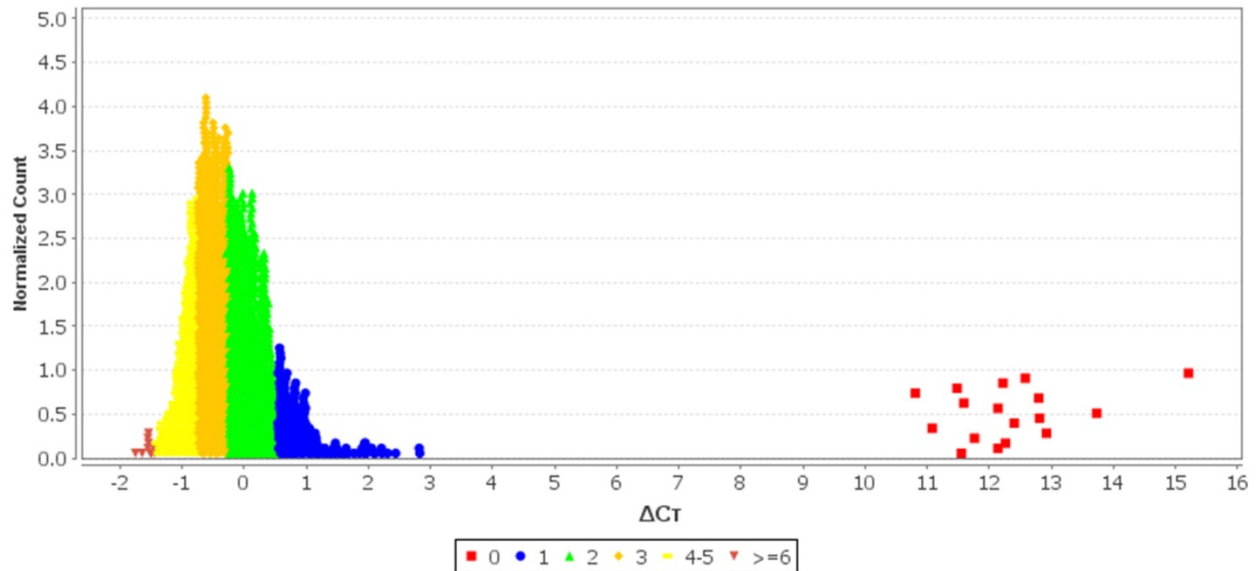

**S1 Fig. Histogram of the  $\Delta C_t$  values for all 1,756 measured DNA samples and cell line OCUB-F.** The  $\Delta C_t$  value was calculated by subtracting the  $C_t$  value for the target gene (*i.e.* *APOBEC3B*) from the  $C_t$  value of the reference gene (*i.e.* *RNase P*). Then  $\Delta C_t$  values were converted to calculated copy number values by the CopyCaller software and grouped into 6 predicted copy number categories. Samples with  $\Delta C_t$  values  $\geq 3.00$  or calculated copy number values  $\leq 0.20$  were grouped into category “0 copies” (red). Samples with  $\Delta C_t$  values  $\geq 0.55$  and  $< 3.00$  or calculated copy number values  $> 0.20$  and  $\leq 1.41$  were grouped into category “1 copy” (blue). Samples with  $\Delta C_t$  values  $\geq -0.29$  and  $< 0.55$  or calculated copy number values  $> 1.41$  and  $\leq 2.52$  were grouped into category “2 copies” (green). Samples with  $\Delta C_t$  values  $\geq -0.74$  and  $< -0.29$  or calculated copy number values  $> 2.52$  and  $\leq 3.44$  were grouped into category “3 copies” (orange). Samples with  $\Delta C_t$  values  $\geq -1.40$  and  $< -0.74$  or calculated copy number values  $> 3.44$  and  $\leq 5.44$  were grouped into category “4-5 copies” (yellow). Samples with  $\Delta C_t$  values  $< -1.40$  or calculated copy number values  $> 5.44$  were grouped into category “ $\geq 6$  copies” (brown). For analyses purposes, we further reduced the six predicted copy number categories to four categories: “two-copy deletion”, “one-copy deletion”, “balanced” and “amplified”. This was achieved by combining the “2 copies” and “3 copies” categories into the “balanced” category and by combining the “4-5 copies” and “ $\geq 6$  copies” categories into the “amplified” category.
